# Supplementary material for: Interplay of Nkx3.2, Sox9 and Pax3 Regulates Chondrogenic Differentiation of Muscle Progenitor Cells
Source: PubMed Central journal article supplement (PMC3388093; doi:10.1371/journal.pone.0039642), 2012-07-02
Supplement: pone.0039642.s010.pdf [file pone.0039642.s010.pdf]

| Species | Gene & Accession No.                    | Forward Sequence                           | Reverse Sequence                                   |
|---------|-----------------------------------------|--------------------------------------------|----------------------------------------------------|
| Chicken | GAPDH<br>NM_204305.1                    | 5'- CCT GCT GCC TAG GGA<br>AGC -3'         | 5'- CAG ATC AGT TTC<br>TAT CAG CCT CT -3'          |
| Chicken | Collagen II<br>NM_204426.1              | 5'- GCA CAA CTT CTG CAC<br>TGA ACG GAT -3' | 5'- TCA CAC CTG CCA<br>GAT TGA TTC CCA -3'         |
| Chicken | Aggrecan<br>XM_001232949.1              | 5'- AGT GAC AAC CCA GTC<br>AGT TGC AGA -3' | 5'- AGA AGC GCT CCC<br>ACC AAA GTC TAT -3'         |
| Chicken | Nkx3.2<br>NM_204137.1                   | 5'- TGC AGC CCT CCT CAC<br>AAG TGT AAT -3' | 5'- CGG GCT GCT TAC<br>ACA CAT TCA CAA -3'         |
| Chicken | Sox9<br>NM_204281.1                     | 5'- GTC TCT GCC GGC TTT<br>ACT TCT TGT -3' | 5'- TGC GAG AAA GCG<br>GCA CAG GG -3'              |
| Chicken | Pax3<br>NM_204269.1                     | 5'- TTC AGG TTT GGT TTA<br>GCA ACC GCC -3' | 5'- TAC TGC TTG GAT<br>CAG ACA CGG CTT -3'         |
| Chicken | Pax7<br>NM_205065.1                     | 5'- AGC CGT GTG CTA CGC<br>ATC AAA TTC -3' | 5'- TTC CTC TTC AAA<br>GGC AGG TCT GGT -3'         |
| Chicken | MyoD<br>NM_204214.1                     | 5'- ACG ACA GCA GCT ACT<br>ACA CGG AAT -3' | 5'- TCT CCA CAA TGC<br>TTG AGA GGC AGT -3'         |
| Chicken | Myogenin<br>NM_204184.1                 | 5'- TGA AAC CGC CCA AAT<br>CCT TTC CCA -3' | 5'- CGA AGA GCA ACT<br>TGG AAA CAG CCA -3'         |
| Chicken | Myosin Heavy Chain<br>(MHC) NM_204228.1 | 5'- GCA GAA TTT CAG AAG<br>ATG CGC CGT -3' | 5'- TGA CTC GTT GCA<br>GGT TGT CGA TCT -3'         |
| Chicken | Nkx3.2HA<br>NM_204137.1<br>ABW40918.1   | 5'- AAG GTG GCC GTC<br>AAG GTG CTG GTG -3' | 5'- GGC GTA GTC AGG<br>CAC GTC GTA AGG ATA         |
| Chicken | Sox9V5<br>NM_204281.1<br>P11207         | 5'- TGA ACC CCA CGC AGC<br>GCC CCA TGT -3' | 5'- ATC CAG TCC CAA<br>CAG TGG GTT CGG GAT -<br>3' |
| Chicken | PPAR $\gamma$<br>NM_001001460.1         | 5'- TGG ACA AGG ATT CAT<br>GAC ACG GGA     | 5'- ACA AAC CTG GGC<br>GAT CTC CAC TTA             |
| Chicken | Osteopontin<br>AAA62729                 | 5'- CAT GCC ATT TCT GCC<br>AGC TCT GAA     | 5'- AAG CCA GGT CAT<br>TCT GTG TCT GCT             |
| Chicken | Vimentin<br>NM_001048076.1              | 5'- TAA GCC TGA TCT TAC<br>TGC TGC CCT     | 5'- ATT AGC TTC TTG TTT<br>GGC CTG GCG             |

| <b>Species</b> | <b>Gene &amp; Accession No.</b>      | <b>Forward Sequence</b>                    | <b>Reverse Sequence</b>                    |
|----------------|--------------------------------------|--------------------------------------------|--------------------------------------------|
| Mouse          | 18S<br>NR_003278.2                   | 5'- TCA ACT TTC GAT GGT<br>AGT CGC CGT -3' | 5'- TCC TTG GAT GTG<br>GTA GCC GTT TCT -3' |
| Mouse          | Collagen II<br>NM_001113515.2        | 5'- ACA TAG GGC CTG TCT<br>GCT TCT TGT -3' | 5'- TGA CTG CGG TTG<br>GAA AGT GTT TGG -3' |
| Mouse          | Nkx3.2<br>NM_007524.3                | 5'- TCA GAA CCG TCG CTA<br>CAA GAC CAA -3' | 5'- CAG CAC CTT TAC<br>GGC CAC TTT CTT -3' |
| Mouse          | Sox9<br>NM_011448.4                  | 5'- AGG TTT CAG ATG CAG<br>TGA GGA GCA -3' | 5'- ACA TAC AGT CCA<br>GGC AGA CCC AAA -3' |
| Mouse          | Pax3<br>NM_008781.4                  | 5'- TAC CAG CCC ACG TCT<br>ATT CCA CAA -3' | 5'- TTT GGT GTA CAG<br>TGC TCG GAG GAA -3' |
| Mouse          | Pax7<br>NM_011039.2                  | 5'- TTC AAA GGA GGA GAC<br>TGT TGG GCT -3' | 5'- TGT GGA GGA GGA<br>TGC ATT TGG TCT -3' |
| Mouse          | Myosin Heavy Chain<br>(MHC) X57377.1 | 5'- AGG CTT ACA AGC AAA<br>TGG CAA GGG -3' | 5'- ACC GCA TGG CAT<br>ACT TAG CAG AGA -3' |
